# Supplementary material
Source: HighWire-hosted journal article supplement (https://care.diabetesjournals.org/content/suppl/2005/04/27/28.5.1139)
Supplement: OnlineAppendixPg1139.pdf [file OnlineAppendixPg1139.pdf]

## DC04-1322 Online Appendix

**Table A-1 PCR Primer sequences and PCR conditions**

|                  | Primer sequence              | Denaturation | Annealing | Extension |
|------------------|------------------------------|--------------|-----------|-----------|
| SNP-11377        |                              | 96°C         | 53°C      | 60°C      |
| Sense Primer     | 5'-ACTTGCCCTGCCTCTGTCTG-3'   |              |           |           |
| Antisense Primer | 5'-GCCTGGAGAACTGGAAGCTG-3'   |              |           |           |
| SNP45 and SNP276 |                              | 96°C         | 53°C      | 60°C      |
| Sense Primer     | 5'-AGAAAGCAGCTCCTAGAAGT-3'   |              |           |           |
| Antisense Primer | 5'-GGCACCATCTACACTCATCC-3'   |              |           |           |
| PPRE:            |                              | 94°C         | 57°C      | 72°C      |
| Sense Primer     | 5'-ACCTGATTGCAGACCCCTCTGA-3' |              |           |           |
| Antisense Primer | 5'-AGCCTCAACAGCCTGGTACTCA-3' |              |           |           |

**Table A-2 The allelic and genotypic distribution of SNP-11377**

|           |    | Number | %     |
|-----------|----|--------|-------|
| Allele    |    |        |       |
| SNP-11377 | C  | 239    | 71.99 |
|           | G  | 93     | 28.01 |
| Genotype  |    |        |       |
| SNP-11377 | CC | 86     | 51.8  |
|           | CG | 67     | 40.4  |
|           | GG | 13     | 7.8   |

**Table A-3 Clinical and biochemical characteristics of the subjects according to the adiponectin genotypes at position -11377**

|                                      | SNP -11377 |            |            |                    |
|--------------------------------------|------------|------------|------------|--------------------|
|                                      | CC         | CG         | GG         | P                  |
| N (male/female)                      | 86 (48/38) | 67 (35/32) | 13 (6/7)   | 0.775 <sup>†</sup> |
| Age (year)                           | 56.1±9.3   | 57.0±10.4  | 55.9±9.9   | 0.807              |
| Duration of diabetes (years)         | 6.8±4.9    | 6.3±6.4    | 5.5±4.5    | 0.775              |
| Body mass index (kg/m <sup>2</sup> ) | 26.4±2.7   | 25.4±2.4   | 24.7±2.1   | 0.051              |
| FPG                                  |            |            |            |                    |
| Before treatment (mmol/l)            | 9.62±2.50  | 9.37±2.60  | 8.28±1.82  | 0.192              |
| (mg/dL)                              | 173.4±45.0 | 168.8±46.8 | 149.1±32.8 |                    |
| After treatment (mmol/l)             | 8.03±2.89  | 7.79±1.95  | 7.53±2.32  | 0.739              |
| (mg/dL)                              | 144.6±52.1 | 140.4±35.1 | 135.6±41.7 |                    |
| Δ FPG (mmol/l)                       | 1.60±2.72  | 1.47±2.31  | 0.75±0.18  | 0.530              |
| (mg/dL)                              | 28.8±49.0  | 26.4±41.6  | 13.5±42.0  |                    |
| HbA1c (%)                            |            |            |            |                    |
| Before treatment                     | 8.45±1.41  | 8.44±1.30  | 8.55±1.27  | 0.968              |
| After treatment                      | 7.85±1.38  | 7.64±1.23  | 7.42±1.39  | 0.428              |
| Δ HbA1c (%)                          | 0.58±1.02  | 0.78±1.21  | 1.12±1.52  | 0.233              |
| Adiponectin (μg/mL)                  |            |            |            |                    |
| Before treatment                     | 5.01±3.56  | 4.64±5.08  | 5.65±6.61  | 0.726              |
| After treatment                      | 8.95±6.55  | 9.66±7.42  | 10.19±7.05 | 0.737              |
| Δ Adiponectin (μg/mL)                | 3.92±5.22  | 5.01±5.31  | 4.53±3.68  | 0.433              |
| HOMA-IR                              | 3.00±1.82  | 3.62±2.34  | 2.25±1.59  | 0.051              |

Data are means ± SD. P values reflect differences between the three groups & are assessed by ANOVA.

<sup>†</sup> P value assessed by chi-square test.

**Table A-4 Results of Multivariate Regression**

## 1) SNP45

| Adiponectin level before treatment | B      | Standard error | P-value |
|------------------------------------|--------|----------------|---------|
| Sex                                | 0.034  | 0.992          | 0.737   |
| Age                                | -0.006 | 0.051          | 0.953   |
| BMI                                | -0.131 | 0.183          | 0.189   |
| Genotype                           | 0.024  | 1.437          | 0.873   |

  

| Adiponectin level after treatment | B      | Standard error | P-value |
|-----------------------------------|--------|----------------|---------|
| Sex                               | 0.018  | 1.406          | 0.859   |
| Age                               | 0.022  | 0.072          | 0.821   |
| BMI                               | -0.106 | 0.259          | 0.280   |
| Genotype                          | 0.263  | 2.036          | 0.073   |

  

| Change in Adiponectin level | B            | Standard error | P-value      |
|-----------------------------|--------------|----------------|--------------|
| Sex                         | -0.008       | 1.012          | 0.737        |
| Age                         | 0.036        | 0.052          | 0.953        |
| BMI                         | -0.021       | 0.186          | 0.189        |
| <b>Genotype</b>             | <b>0.340</b> | <b>1.466</b>   | <b>0.020</b> |

## 2) SNP276

| Adiponectin level before treatment | B      | Standard error | P-value |
|------------------------------------|--------|----------------|---------|
| Sex                                | 0.022  | 0.969          | 0.823   |
| Age                                | -0.030 | 0.050          | 0.760   |
| BMI                                | -0.053 | 0.178          | 0.182   |
| Genotype                           | -0.169 | 1.845          | 0.593   |

  

| Adiponectin level after treatment | B      | Standard error | P-value |
|-----------------------------------|--------|----------------|---------|
| Sex                               | -0.096 | 1.408          | 0.924   |
| Age                               | -0.064 | 0.073          | 0.949   |
| BMI                               | -1.166 | 0.259          | 0.246   |
| Genotype                          | 0.287  | 2.682          | 0.775   |

  

| Change in Adiponectin level | B      | Standard error | P-value |
|-----------------------------|--------|----------------|---------|
| Sex                         | -0.341 | 1.029          | 0.734   |
| Age                         | 0.200  | 0.054          | 0.841   |
| BMI                         | -0.329 | 0.189          | 0.743   |
| Genotype                    | 0.897  | 1.961          | 0.372   |

3) Haplotype SNP45/276

| Adiponectin level before treatment | B      | Standard error | P-value |
|------------------------------------|--------|----------------|---------|
| Sex                                | 0.034  | 0.996          | 0.736   |
| Age                                | -0.007 | 0.051          | 0.943   |
| BMI                                | -0.133 | 0.182          | 0.183   |
| Haplotype                          | 0.015  | 1.442          | 0.876   |

  

| Adiponectin level after treatment | B      | Standard error | P-value |
|-----------------------------------|--------|----------------|---------|
| Sex                               | 0.011  | 1.418          | 0.913   |
| Age                               | 0.018  | 0.073          | 0.850   |
| BMI                               | -0.112 | 0.260          | 0.255   |
| Haplotype                         | 0.169  | 2.052          | 0.087   |

  

| Change in Adiponectin level | B            | Standard error | P-value      |
|-----------------------------|--------------|----------------|--------------|
| Sex                         | -0.018       | 1.018          | 0.859        |
| Age                         | 0.032        | 0.052          | 0.739        |
| BMI                         | -0.028       | 0.186          | 0.778        |
| <b>Haplotype</b>            | <b>0.219</b> | <b>1.474</b>   | <b>0.027</b> |
